# Supplementary material
Source: PubMed Central journal article supplement (PMC2104768)
Supplement: thorax_thx.2005.049940_1.pdf [file thorax_thx.2005.049940_1.pdf]

**Table: Patient case-mix factor associates of outcome.**

| OUTCOMES                                                                             | Inpatient death                                                                                                 | Death < 90 days of admission                                                                                                                                                        | Readmission <90 days of admission                                                  | Length of stay >7 days                                                                                                                  | Length of stay >14 days                                                                                                                |
|--------------------------------------------------------------------------------------|-----------------------------------------------------------------------------------------------------------------|-------------------------------------------------------------------------------------------------------------------------------------------------------------------------------------|------------------------------------------------------------------------------------|-----------------------------------------------------------------------------------------------------------------------------------------|----------------------------------------------------------------------------------------------------------------------------------------|
| PATIENTS*                                                                            | 7300                                                                                                            | 7261                                                                                                                                                                                | 6574 discharged                                                                    | 6534 discharged                                                                                                                         | 6534 discharged                                                                                                                        |
| FINAL FACTOR SET IN STEPWISE SELECTION ORDER (all P<0.001, SPSS logistic regression) | Performance status<br>SaO2<br>Blood urea<br>pH<br>Serum Albumin<br>Age<br>FEV1<br>Xray cancer<br>Xray pneumonia | Performance status<br>Blood urea<br>Serum Albumin<br>pH<br>Age<br>SaO2<br>Xray cancer<br>Weight<br>Smoking status                                                                   | Previous admission<br>Performance status<br>FEV1<br>Xray cancer                    | Performance status<br>SaO2<br>Age<br>Serum Albumin<br>Respiratory rate<br>Living alone<br>PCO2<br>Smoking status<br>Gender              | Performance status<br>Serum Albumin<br>Age<br>SAO2<br>Respiratory rate<br>Bic<br>Blood urea<br>Living alone                            |
| % VARIANCE (R <sup>2</sup> ) EXPLAINED:                                              |                                                                                                                 |                                                                                                                                                                                     |                                                                                    |                                                                                                                                         |                                                                                                                                        |
| BY FINAL FACTOR SET                                                                  | 25%                                                                                                             | 21%                                                                                                                                                                                 | 9%                                                                                 | 13%                                                                                                                                     | 10%                                                                                                                                    |
| BY ALL TABLE 2 FACTORS                                                               | 29%                                                                                                             | 25%                                                                                                                                                                                 | 11%                                                                                | 16%                                                                                                                                     | 13%                                                                                                                                    |
| OTHER PROGNOSIC FACTORS, FROM UNIVARIATE ANALYSES (P<0.001)                          | Social circumstances, smoking status, weight, %pred FEV1, Blood creatinine, Bic, PO2, PCO2, respiratory rate    | Previous admission, Social circumstances, xray pneumonia, xray other abnormality, change in volume of sputum, FEV1, %pred FEV1, blood creatinine, Bic, PCO2, PO2, respiratory rate, | Social circumstances, heart disease, smoking status, weight, %pred FEV1, Bic, PCO2 | Admitting physician, social circumstances, heart disease, xray pneumonia, FEV1, %pred FEV1, blood urea, blood creatinine, Bic, pH, PO2, | Admitting physician, social circumstances, heart disease, smoking status, xray pneumonia, FEV1, %pred FEV1, blood creatinine, pH, PCO2 |

- 13 patients with missing age and/or gender were excluded

Bicarbonate (Bic), PCO2 and PO2 were all taken from the initial arterial blood gas sample where one was recorded.

Arterial oxygen saturation (SaO2) was taken from the first pulse oximetry measurement recorded at presentation.

The R2 statistic described by Nagelkerke was used to quantify the proportion of the explained variation in the regression model in keeping with previous work.
